# Supplementary material
Source: PubMed Central journal article supplement (PMC9941723)
Supplement: mmc1.pdf [file mmc1.pdf]

**Biophysical Journal, Volume 122**

**Supplemental information**

**Thermodynamic determination of RNA duplex stability in magnesium solutions**

**Sebastian J. Arteaga, Miranda S. Adams, Nicole L. Meyer, Katherine E. Richardson, Scott Hoener, and Brent M. Znosko**

## Supplemental Data

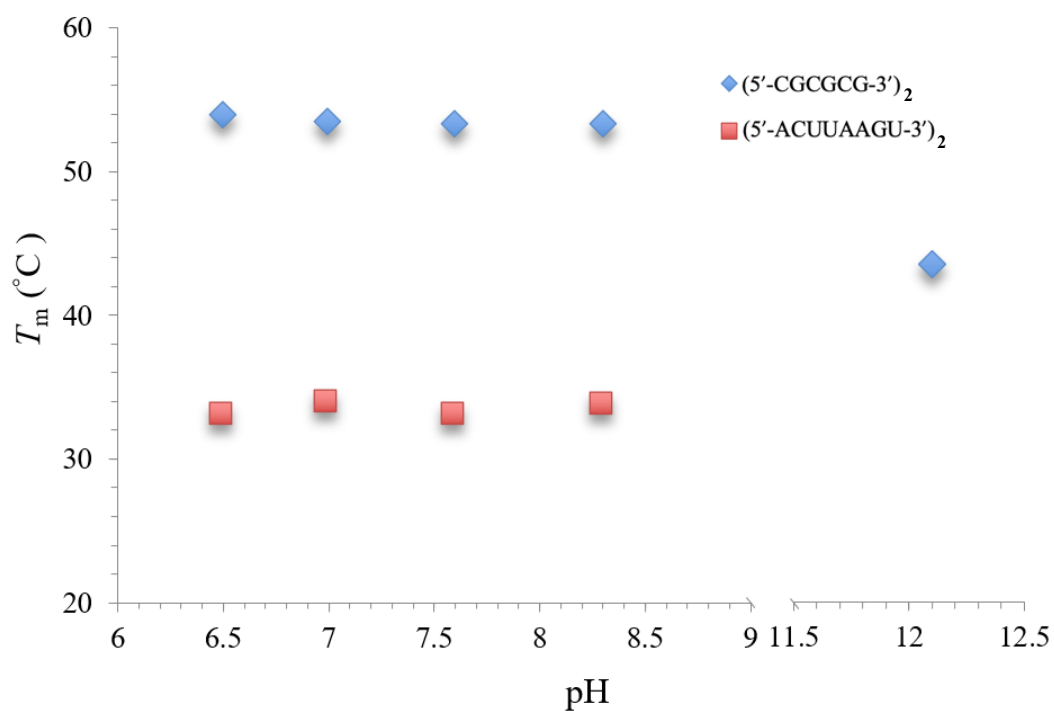

**FIGURE S1.** Melting temperatures ( $T_m$ ) for  $(5'-CGCGCG-3')_2$  and  $(5'-ACUUAAGU-3')_2$  in buffered solutions at pH 6.5, 7.0, 7.6, 8.3, and 12.1. Data was acquired following the same melt scheme outlined in the Optical Melting Studies section of the Materials and Methods in the main text. *MeltWin* v3.5 (15) was used to fit the data from the melt curves to an assumed two-state model and construct a  $T_m^{-1}$  vs  $\ln C_T$  plots. Data from the  $T_m^{-1}$  vs  $\ln C_T$  plots were used to determine the  $T_m$  of each duplex at 0.1 mM.

## Supplemental Data

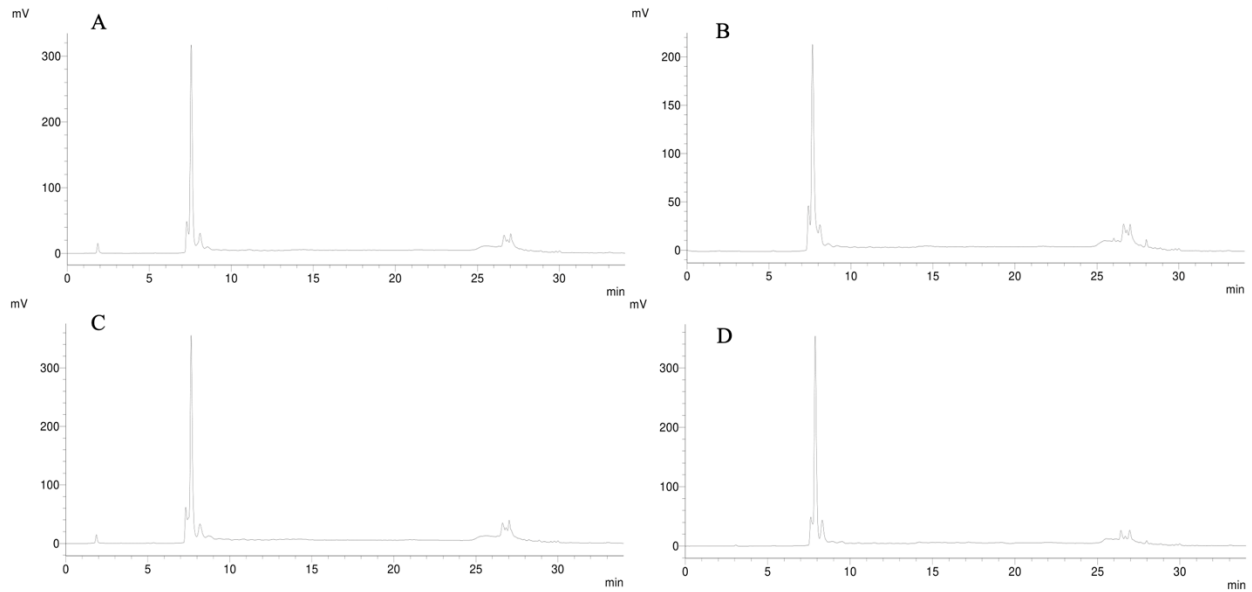

**FIGURE S2.** Liquid chromatography chromatograms for  $(5'\text{-CGCGCG-3}')_2$  before and after melting experiments. The before melting in (A) 10.0 mM  $\text{MgCl}_2$  with 2 mM Tris and (B) in standard 1.0 M NaCl buffer chromatograms. Additionally, after melting in (C) 10.0 mM  $\text{MgCl}_2$  with 2 mM Tris and (D) in 1.0 M NaCl standard buffer chromatograms.

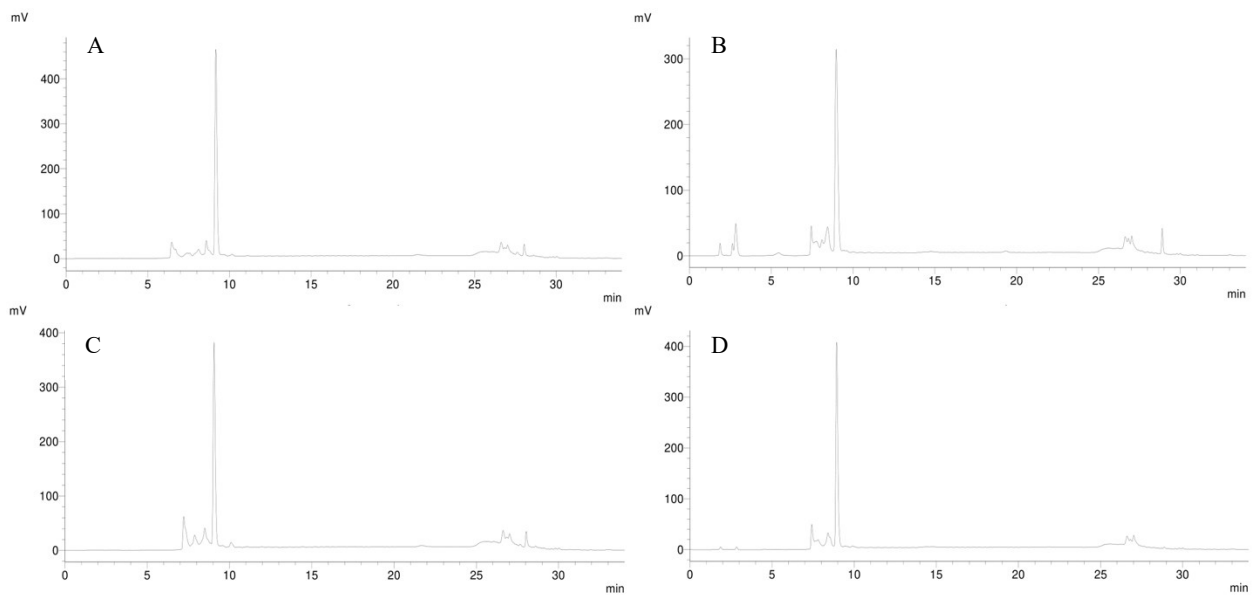

**FIGURE S3.** Liquid chromatography chromatograms for  $(5'\text{-ACUUAAGU-3}')_2$  before and after melting experiments. The before melting in (A) 10.0 mM  $\text{MgCl}_2$  with 2 mM Tris and (B) in standard 1.0 M NaCl buffer chromatograms. Additionally, after melting in (C) 10.0 mM  $\text{MgCl}_2$  with 2 mM Tris and (D) in 1.0 M NaCl standard buffer chromatograms.

## Supplemental Data

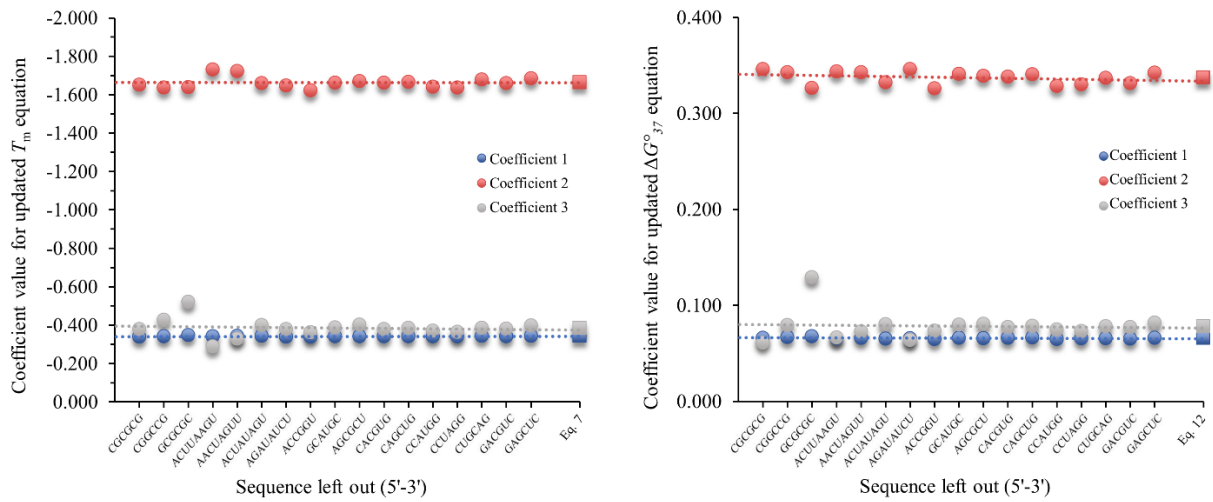

**FIGURE S4.** Leave-one-out analysis with updated coefficients for Eq. 7 and Eq. 12. The sequences excluded in each of the leave-one-out analyses are shown on the horizontal axis. The updated coefficients used in the Eq. 7 (left) and Eq. 12 (right) leave-one-out analysis are shown as circles with the actual, proposed coefficients shown as squares. Coefficients are numbered in the order they appear in the equations.

## Supplemental Data

**TABLE S1.** Experimental RNA Thermodynamic Parameters for Duplexes Subjected to Forward and Reverse Optical Melting Experiments in Buffers Containing Magnesium and Standard Conditions.

| RNA Sequence (5' to 3') <sup>b</sup> | Exper. <sup>c</sup> | [Salt]                    | Analysis of curve fits      |                              |                                  |              | Analysis of $T_m^{-1}$ vs. $\ln C_T$ Plot |                              |                                  |              |
|--------------------------------------|---------------------|---------------------------|-----------------------------|------------------------------|----------------------------------|--------------|-------------------------------------------|------------------------------|----------------------------------|--------------|
|                                      |                     |                           | $\Delta H^\circ$ (kcal/mol) | $\Delta S^\circ$ (cal/K·mol) | $\Delta G^\circ_{37}$ (kcal/mol) | $T_m^a$ (°C) | $\Delta H^\circ$ (kcal/mol)               | $\Delta S^\circ$ (cal/K·mol) | $\Delta G^\circ_{37}$ (kcal/mol) | $T_m^a$ (°C) |
| CGCGCG                               | Forward             | 10.0 mM MgCl <sub>2</sub> | -57.2 ± 2.7                 | -153.6 ± 8.4                 | -9.59 ± 0.16                     | 59.8         | -59.9 ± 1.8                               | -161.6 ± 5.4                 | -9.75 ± 0.12                     | 59.6         |
|                                      | Reverse             | 10.0 mM MgCl <sub>2</sub> | -58.6 ± 2.2                 | -158.0 ± 7.0                 | -9.62 ± 0.08                     | 59.4         | -60.8 ± 2.9                               | -164.5 ± 8.7                 | -9.74 ± 0.19                     | 59.2         |
|                                      | Forward             | 1.0 M NaCl                | -56.5 ± 4.2                 | -152.5 ± 12.9                | -9.17 ± 0.20                     | 57.4         | -59.9 ± 1.5                               | -163.1 ± 4.6                 | -9.31 ± 0.08                     | 57.0         |
|                                      | Reverse             | 1.0 M NaCl                | -57.1 ± 2.4                 | -154.1 ± 7.3                 | -9.26 ± 0.16                     | 57.8         | -56.7 ± 1.4                               | -153.2 ± 4.2                 | -9.21 ± 0.08                     | 57.6         |
| ACUUAAGU                             | Forward             | 10.0 mM MgCl <sub>2</sub> | -61.5 ± 8.4                 | -177.8 ± 26.9                | -6.36 ± 0.07                     | 40.5         | -58.3 ± 6.5                               | -167.8 ± 21.0                | -6.26 ± 0.08                     | 40.2         |
|                                      | Reverse             | 10.0 mM MgCl <sub>2</sub> | -59.4 ± 8.1                 | -171.1 ± 25.5                | -6.32 ± 0.20                     | 40.4         | -52.2 ± 1.5                               | -148.2 ± 4.7                 | -6.21 ± 0.00                     | 40.2         |
|                                      | Forward             | 1.0 M NaCl                | -63.3 ± 7.8                 | -183.9 ± 24.9                | -6.30 ± 0.14                     | 40.1         | -52.4 ± 3.3                               | -148.8 ± 10.6                | -6.24 ± 0.03                     | 40.4         |
|                                      | Reverse             | 1.0 M NaCl                | -59.2 ± 6.9                 | -170.6 ± 22.2                | -6.33 ± 0.04                     | 40.5         | -53.9 ± 4.2                               | -153.5 ± 13.8                | -6.25 ± 0.05                     | 40.4         |

<sup>a</sup>Calculated for 0.1 mM oligonucleotide concentrations based on the  $T_m^{-1}$  vs  $\ln C_T$  plots.

<sup>b</sup>All oligonucleotides are forming self-complementary duplexes in solution.

<sup>c</sup>Forward and reverse optical melting experiments followed the same heating rate as mentioned in the optical melting studies section of the Materials and Methods.

**TABLE S2.** Experimental RNA Thermodynamic Parameters for Reused or Fresh Duplexes in the Melt Scheme.

| RNA Sequence (5' to 3') <sup>b</sup> | Oligo. <sup>c</sup> | [Salt]                    | Analysis of curve fits      |                              |                                  |              | Analysis of $T_m^{-1}$ vs. $\ln C_T$ Plot |                              |                                  |              |
|--------------------------------------|---------------------|---------------------------|-----------------------------|------------------------------|----------------------------------|--------------|-------------------------------------------|------------------------------|----------------------------------|--------------|
|                                      |                     |                           | $\Delta H^\circ$ (kcal/mol) | $\Delta S^\circ$ (cal/K·mol) | $\Delta G^\circ_{37}$ (kcal/mol) | $T_m^a$ (°C) | $\Delta H^\circ$ (kcal/mol)               | $\Delta S^\circ$ (cal/K·mol) | $\Delta G^\circ_{37}$ (kcal/mol) | $T_m^a$ (°C) |
| CGCGCG                               | Reused              | 10.0 mM MgCl <sub>2</sub> | -58.5 ± 6.9                 | -156.9 ± 20.9                | -9.80 ± 0.48                     | 60.5         | -59.9 ± 5.0                               | -161.3 ± 15.2                | -9.86 ± 0.33                     | 60.3         |
|                                      | Fresh               | 10.0 mM MgCl <sub>2</sub> | -57.3 ± 2.7                 | -154.1 ± 8.3                 | -9.54 ± 0.12                     | 59.4         | -62.7 ± 2.4                               | -170.4 ± 7.3                 | -9.86 ± 0.16                     | 59.2         |
| ACUUAAGU                             | Reused              | 10.0 mM MgCl <sub>2</sub> | -69.9 ± 8.7                 | -204.6 ± 28.0                | -6.42 ± 0.08                     | 40.4         | -69.9 ± 1.8                               | -204.8 ± 5.6                 | -6.34 ± 0.01                     | 40.0         |
|                                      | Fresh               | 10.0 mM MgCl <sub>2</sub> | -59.6 ± 6.4                 | -171.9 ± 20.7                | -6.32 ± 0.06                     | 40.4         | -56.1 ± 2.1                               | -160.8 ± 6.9                 | -6.25 ± 0.02                     | 40.2         |

<sup>a</sup>Calculated for 0.1 mM oligonucleotide concentrations based on the  $T_m^{-1}$  vs  $\ln C_T$  plots.

<sup>b</sup>All oligonucleotides are forming self-complementary duplexes in solution.

<sup>c</sup>Reused oligonucleotide in the melt scheme corresponds to performing an optical melting experiment where previously melted oligonucleotide samples were diluted and melted again at a different concentration. Fresh oligonucleotide in the melt scheme corresponds to performing an optical melting experiment where fresh, never melted oligonucleotide samples were used at each concentration.

## Supplemental Data

**TABLE S3.** Experimental RNA Thermodynamic Parameters for Duplex Formation.

| Sequence <sup>a</sup> | [Mg <sup>2+</sup> ]   | Analysis of curve fits           |                                   |                                       |                 | Analysis of $T_m^{-1}$ vs. $\ln C_T$ Plot |                                   |                                       |                 |
|-----------------------|-----------------------|----------------------------------|-----------------------------------|---------------------------------------|-----------------|-------------------------------------------|-----------------------------------|---------------------------------------|-----------------|
|                       |                       | $\Delta H^{\circ}$<br>(kcal/mol) | $\Delta S^{\circ}$<br>(cal/K·mol) | $\Delta G_{37}^{\circ}$<br>(kcal/mol) | $T_m^c$<br>(°C) | $\Delta H^{\circ}$<br>(kcal/mol)          | $\Delta S^{\circ}$<br>(cal/K·mol) | $\Delta G_{37}^{\circ}$<br>(kcal/mol) | $T_m^c$<br>(°C) |
| CGCGCG                | 0.5 mM                | -56.8±7.4                        | -155.4±22.8                       | -8.59±0.31                            | 53.8            | -62.2±4.1                                 | -172.1±12.7                       | -8.78±0.18                            | 53.3            |
|                       | 1.5 mM                | -59.4±8.0                        | -161.6±24.5                       | -9.31±0.38                            | 57.2            | -60.3±2.3                                 | -164.3±6.9                        | -9.35±0.11                            | 57.1            |
|                       | 3.0 mM                | -55.3±2.2                        | -148.4±7.1                        | -9.25±0.08                            | 58.4            | -58.1±5.1                                 | -156.8±15.7                       | -9.40±0.32                            | 58.3            |
|                       | 10.0 mM               | -58.5±6.9                        | -156.9±20.9                       | -9.80±0.48                            | 60.5            | -59.9±5.0                                 | -161.3±15.2                       | -9.86±0.33                            | 60.3            |
|                       | 1 M NaCl <sup>b</sup> | -53.8                            | -144.2                            | -9.08                                 | 57.9            | -54.5                                     | -146.4                            | -9.12                                 | 57.8            |
| CGGCCG                | 0.5 mM                | -56.1±9.2                        | -150.8±28.1                       | -9.37±0.51                            | 58.9            | -57.6±5.2                                 | -155.5±15.9                       | -9.37±0.32                            | 58.2            |
|                       | 1.5 mM                | -54.3±2.7                        | -143.9±8.1                        | -9.64±0.15                            | 61.4            | -56.5±0.9                                 | -150.7±2.6                        | -9.77±0.06                            | 61.2            |
|                       | 3.0 mM                | -55.5±7.7                        | -146.5±22.6                       | -10.12±0.69                           | 63.9            | -55.6±3.9                                 | -146.7±11.6                       | -10.07±0.30                           | 63.6            |
|                       | 10.0 mM               | -55.2±4.1                        | -145.0±12.1                       | -10.25±0.32                           | 65.0            | -55.5±3.6                                 | -145.9±10.8                       | -10.25±0.26                           | 64.9            |
|                       | 1 M NaCl <sup>b</sup> | -56.6                            | -150.0                            | -10.11                                | 63.3            | -54.1                                     | -142.6                            | -9.90                                 | 63.2            |
| GCGGCG                | 0.5 mM                | -59.6±7.5                        | -162.3±22.6                       | -9.29±0.46                            | 57.0            | -60.9±5.9                                 | -166.1±17.9                       | -9.34±0.34                            | 56.9            |
|                       | 1.5 mM                | -60.8±8.6                        | -164.6±25.7                       | -9.78±0.70                            | 59.5            | -59.8±14.9                                | -161.4±44.4                       | -9.70±1.40                            | 59.4            |
|                       | 3.0 mM                | -60.6±4.0                        | -163.1±12.1                       | -10.04±0.25                           | 61.0            | -62.0±2.8                                 | -167.4±8.4                        | -10.13±0.17                           | 61.0            |
|                       | 10.0 mM               | -59.3±6.1                        | -158.3±18.3                       | -10.19±0.47                           | 62.6            | -60.2±7.5                                 | -161.2±22.2                       | -10.22±0.59                           | 62.3            |
|                       | 1 M NaCl <sup>b</sup> | -61.2                            | -164.0                            | -10.38                                | 62.8            | -64.3                                     | -173.4                            | -10.56                                | 62.5            |
| ACCGGU                | 0.5 mM                | -55.0±5.0                        | -150.5±15.4                       | -8.36±0.25                            | 52.9            | -60.1±3.2                                 | -166.3±9.9                        | -8.50±0.12                            | 52.3            |
|                       | 1.5 mM                | -54.5±2.7                        | -147.4±8.5                        | -8.79±0.12                            | 55.8            | -55.8±2.4                                 | -151.4±7.5                        | -8.83±0.10                            | 55.6            |
|                       | 3.0 mM                | -59.6±9.1                        | -162.1±27.6                       | -9.30±0.53                            | 57.1            | -58.7±7.8                                 | -159.5±23.9                       | -9.21±0.46                            | 56.8            |
|                       | 10.0 mM               | -59.6±9.2                        | -161.0±28.2                       | -9.64±0.50                            | 59.1            | -63.0±2.7                                 | -171.8±8.2                        | -9.74±0.13                            | 58.4            |
|                       | 1 M NaCl <sup>b</sup> | -53.2                            | -144.9                            | -8.26                                 | 52.8            | -59.8                                     | -164.5                            | -8.51                                 | 53.9            |
| AGCGCU                | 0.5 mM                | -49.9±7.0                        | -139.2±22.2                       | -6.70±0.15                            | 43.5            | -48.6±3.6                                 | -135.1±11.6                       | -6.65±0.10                            | 43.3            |
|                       | 1.5 mM                | -46.9±3.2                        | -127.8±10.0                       | -7.28±0.15                            | 48.0            | -52.8±4.7                                 | -146.7±14.9                       | -7.33±0.15                            | 47.0            |
|                       | 3.0 mM                | -48.5±4.8                        | -132.1±14.9                       | -7.55±0.26                            | 49.5            | -51.3±2.9                                 | -140.7±9.3                        | -7.61±0.10                            | 49.2            |
|                       | 10.0 mM               | -52.0±6.2                        | -141.6±18.9                       | -8.10±0.34                            | 52.1            | -54.3±3.0                                 | -148.9±9.4                        | -8.13±0.12                            | 51.7            |
|                       | 1 M NaCl <sup>b</sup> | -50.9                            | -137.9                            | -8.13                                 | 52.7            | -50.1                                     | -135.7                            | -7.99                                 | 52.0            |
|                       | 0.5 mM                | -54.2±2.4                        | -155.3±7.8                        | -5.99±0.06                            | 38.8            | -53.3±1.5                                 | -152.5±4.9                        | -5.96±0.02                            | 38.7            |

## Supplemental Data

|        |                       |           |             |            |      |           |             |            |      |
|--------|-----------------------|-----------|-------------|------------|------|-----------|-------------|------------|------|
| CACGUG | 1.5 mM                | -56.1±4.2 | -159.8±13.3 | -6.52±0.08 | 41.7 | -52.7±2.0 | -149.2±6.4  | -6.46±0.03 | 41.7 |
|        | 3.0 mM                | -56.5±2.8 | -160.3±8.8  | -6.81±0.08 | 43.3 | -56.5±1.4 | -160.2±4.5  | -6.78±0.02 | 43.2 |
|        | 10.0 mM               | -56.8±5.7 | -160.3±17.8 | -7.09±0.19 | 44.9 | -55.3±3.5 | -155.5±11.2 | -7.05±0.09 | 44.9 |
|        | 1 M NaCl <sup>b</sup> | -55.3     | -156.8      | -6.68      | 42.8 | -50.3     | -141.0      | -6.59      | 42.7 |
| CAGCUG | 0.5 mM                | -52.4±3.5 | -150.3±11.1 | -5.81±0.19 | 37.8 | -51.8±4.4 | -148.3±14.1 | -5.83±0.12 | 37.9 |
|        | 1.5 mM                | -54.6±7.9 | -155.3±25.3 | -6.41±0.11 | 41.2 | -53.8±2.0 | -153.0±6.3  | -6.32±0.02 | 40.8 |
|        | 3.0 mM                | -54.4±3.6 | -153.9±11.6 | -6.65±0.06 | 42.6 | -54.7±2.0 | -155.1±6.3  | -6.61±0.02 | 42.4 |
|        | 10.0 mM               | -54.9±4.0 | -154.4±12.6 | -7.04±0.10 | 44.9 | -54.7±1.5 | -153.9±4.8  | -6.99±0.02 | 44.7 |
|        | 1 M NaCl <sup>b</sup> | -50.2     | -140.0      | -6.78      | 44.0 | -51.6     | -144.7      | -6.68      | 43.1 |
| CCAUGG | 0.5 mM                | -58.8±5.4 | -166.8±17.2 | -7.04±0.13 | 44.3 | -62.4±2.5 | -178.4±8.1  | -7.02±0.04 | 43.9 |
|        | 1.5 mM                | -59.6±4.6 | -167.9±14.7 | -7.48±0.14 | 46.7 | -62.0±4.9 | -175.8±15.5 | -7.48±0.14 | 46.3 |
|        | 3.0 mM                | -60.7±4.2 | -170.3±13.5 | -7.83±0.08 | 48.4 | -64.8±2.4 | -183.5±7.6  | -7.88±0.06 | 47.9 |
|        | 10.0 mM               | -60.5±6.9 | -168.6±21.8 | -8.23±0.17 | 50.7 | -64.0±2.8 | -179.6±8.9  | -8.26±0.08 | 50.1 |
|        | 1 M NaCl <sup>b</sup> | -61.0     | -172.5      | -7.49      | 46.6 | -56.9     | -159.9      | -7.30      | 46.3 |
| CCUAGG | 0.5 mM                | -56.3±3.0 | -156.3±9.6  | -7.77±0.11 | 49.0 | -61.4±3.2 | -172.7±10.2 | -7.86±0.08 | 48.4 |
|        | 1.5 mM                | -56.6±6.0 | -156.0±18.2 | -8.20±0.35 | 51.5 | -59.5±3.6 | -165.1±11.1 | -8.31±0.12 | 51.4 |
|        | 3.0 mM                | -60.9±5.6 | -168.5±17.6 | -8.61±0.16 | 52.7 | -62.3±3.4 | -173.1±10.6 | -8.61±0.13 | 52.3 |
|        | 10.0 mM               | -56.6±9.2 | -154.3±28.7 | -8.78±0.29 | 55.0 | -60.3±6.1 | -165.8±19.1 | -8.84±0.26 | 54.2 |
|        | 1 M NaCl <sup>b</sup> | -59.7     | -166.5      | -8.06      | 49.9 | -54.1     | -149.1      | -7.80      | 50.0 |
| CUGCAG | 0.5 mM                | -54.4±3.8 | -155.2±12.6 | -6.29±0.27 | 40.5 | -53.4±6.9 | -152.0±22.2 | -6.27±0.27 | 40.5 |
|        | 1.5 mM                | -54.1±4.7 | -152.6±14.8 | -6.76±0.14 | 43.3 | -59.0±3.2 | -168.6±10.4 | -6.76±0.05 | 42.8 |
|        | 3.0 mM                | -58.1±7.4 | -164.5±24.1 | -7.13±0.09 | 44.9 | -66.1±3.0 | -189.8±9.7  | -7.18±0.05 | 44.2 |
|        | 10.0 mM               | -57.9±4.1 | -162.5±12.8 | -7.52±0.13 | 47.2 | -59.7±2.4 | -168.2±7.7  | -7.53±0.06 | 46.9 |
|        | 1 M NaCl <sup>b</sup> | -54.5     | -153.0      | -7.05      | 45.0 | -55.4     | -155.7      | -7.11      | 45.3 |
| GACGUC | 0.5 mM                | -57.4±4.1 | -164.1±13.2 | -6.56±0.10 | 41.8 | -56.6±2.8 | -161.4±8.9  | -6.51±0.04 | 41.6 |
|        | 1.5 mM                | -57.9±3.5 | -163.3±11.2 | -7.22±0.05 | 45.5 | -60.4±2.4 | -171.5±7.6  | -7.24±0.04 | 45.2 |
|        | 3.0 mM                | -60.5±3.5 | -171.2±11.6 | -7.43±0.10 | 46.2 | -65.2±3.9 | -186.1±12.4 | -7.48±0.09 | 45.8 |
|        | 10.0 mM               | -60.6±4.2 | -169.8±13.3 | -7.90±0.09 | 48.8 | -64.6±2.8 | -182.6±8.8  | -7.96±0.08 | 48.4 |
|        | 1 M NaCl <sup>b</sup> | -57.3     | -161.0      | -7.37      | 46.4 | -58.1     | -163.5      | -7.35      | 46.2 |
| GAGCUC | 0.5 mM                | -55.8±2.7 | -159.2±8.6  | -6.48±0.10 | 41.5 | -54.7±2.3 | -155.4±7.5  | -6.45±0.03 | 41.4 |

## Supplemental Data

|          |                       |           |             |            |      |           |             |            |      |
|----------|-----------------------|-----------|-------------|------------|------|-----------|-------------|------------|------|
|          | 1.5 mM                | -59.7±6.5 | -169.2±20.8 | -7.17±0.10 | 45.0 | -61.7±2.9 | -176.0±9.2  | -7.14±0.05 | 44.5 |
|          | 3.0 mM                | -57.4±4.3 | -161.1±13.5 | -7.49±0.18 | 47.1 | -61.2±2.5 | -173.1±8.1  | -7.53±0.05 | 46.7 |
|          | 10.0 mM               | -57.0±3.6 | -158.7±11.5 | -7.79±0.09 | 48.9 | -61.3±2.4 | -172.2±7.6  | -7.87±0.07 | 48.5 |
|          | 1 M NaCl <sup>b</sup> | -58.3     | -163.0      | -7.75      | 48.4 | -62.3     | -175.3      | -7.98      | 48.6 |
| GCAUGC   | 0.5 mM                | -55.9±4.7 | -160.0±14.8 | -6.28±0.16 | 40.4 | -56.1±4.5 | -160.7±14.4 | -6.23±0.12 | 40.1 |
|          | 1.5 mM                | -58.1±5.7 | -165.2±17.9 | -6.90±0.15 | 43.7 | -58.9±3.9 | -167.7±12.3 | -6.85±0.08 | 43.3 |
|          | 3.0 mM                | -56.6±9.0 | -159.4±28.4 | -7.20±0.20 | 45.6 | -58.6±2.3 | -165.8±7.2  | -7.15±0.04 | 45.0 |
|          | 10.0 mM               | -58.1±5.6 | -162.9±17.6 | -7.59±0.19 | 47.6 | -58.3±3.5 | -163.7±11.1 | -7.52±0.10 | 47.2 |
|          | 1 M NaCl <sup>b</sup> | -59.6     | -168.4      | -7.41      | 46.3 | -62.3     | -177.2      | -7.38      | 45.7 |
| AACUAGUU | 0.5 mM                | -58.6±4.2 | -169.8±13.6 | -5.99±0.14 | 38.7 | -55.6±3.3 | -160.1±10.9 | -6.00±0.08 | 38.8 |
|          | 1.5 mM                | -60.9±7.1 | -174.8±23.0 | -6.73±0.14 | 42.5 | -64.0±3.2 | -184.6±10.4 | -6.69±0.04 | 42.0 |
|          | 3.0 mM                | -61.7±6.2 | -176.9±19.9 | -6.88±0.11 | 43.2 | -58.7±1.6 | -167.0±5.1  | -6.86±0.02 | 43.4 |
|          | 10.0 mM               | -61.5±5.7 | -174.4±18.0 | -7.43±0.12 | 46.1 | -61.1±2.8 | -173.3±8.9  | -7.36±0.05 | 45.8 |
|          | 1 M NaCl <sup>b</sup> | -55.2     | -155.0      | -7.13      | 45.4 | -54.6     | -153.0      | -7.16      | 45.7 |
| ACUAUAGU | 0.5 mM                | -60.7±3.5 | -176.8±11.3 | -5.90±0.05 | 38.2 | -60.2±2.0 | -175.3±6.6  | -5.89±0.03 | 38.1 |
|          | 1.5 mM                | -63.9±4.3 | -184.9±13.8 | -6.54±0.10 | 41.2 | -64.8±3.0 | -188.0±9.7  | -6.51±0.04 | 41.0 |
|          | 3.0 mM                | -65.7±4.4 | -189.3±14.1 | -6.94±0.07 | 43.1 | -63.2±2.4 | -181.6±7.7  | -6.89±0.03 | 43.1 |
|          | 10.0 mM               | -69.4±4.0 | -199.8±12.9 | -7.39±0.09 | 44.9 | -68.7±2.8 | -197.7±9.1  | -7.35±0.05 | 44.7 |
|          | 1 M NaCl <sup>b</sup> | -61.4     | -175.0      | -7.12      | 44.5 | -59.2     | -168.4      | -6.98      | 44.0 |
| ACUUAAGU | 0.5 mM                | -55.5±8.9 | -163.5±29.3 | -4.76±0.30 | 32.0 | -51.1±5.9 | -149.2±19.4 | -4.85±0.22 | 32.1 |
|          | 1.5 mM                | -54.1±7.8 | -156.6±25.4 | -5.55±0.15 | 36.3 | -57.3±4.4 | -167.0±14.2 | -5.47±0.09 | 35.9 |
|          | 3.0 mM                | -65.1±6.4 | -190.4±20.7 | -6.01±0.13 | 38.6 | -59.4±3.7 | -172.1±11.9 | -5.97±0.06 | 38.5 |
|          | 10.0 mM               | -69.9±8.7 | -204.6±28.0 | -6.42±0.08 | 40.4 | -69.9±1.8 | -204.8±5.6  | -6.34±0.01 | 40.0 |
|          | 1 M NaCl <sup>b</sup> | -49.4     | -139.0      | -6.29      | 40.9 | -47.2     | -132.4      | -6.16      | 40.3 |
| AGAUAUCU | 0.5 mM                | -59.6±2.8 | -175.2±9.1  | -5.28±0.03 | 35.0 | -61.1±1.4 | -180.0±4.8  | -5.27±0.04 | 34.9 |
|          | 1.5 mM                | -62.1±4.9 | -181.4±15.8 | -5.82±0.08 | 37.7 | -61.4±2.2 | -179.2±7.2  | -5.83±0.03 | 37.8 |
|          | 3.0 mM                | -62.9±3.5 | -182.3±11.2 | -6.33±0.09 | 40.2 | -63.6±2.3 | -184.9±7.5  | -6.29±0.02 | 40.0 |
|          | 10.0 mM               | -62.1±4.0 | -178.1±12.8 | -6.83±0.07 | 42.9 | -57.1±1.2 | -162.2±3.9  | -6.78±0.01 | 43.1 |
|          | 1 M NaCl <sup>b</sup> | -63.4     | -183.0      | -6.64      | 41.8 | -64.5     | -186.8      | -6.58      | 41.4 |

<sup>a</sup>Sequences are written 5' to 3' and form self-complementary duplexes in solution.

<sup>b</sup>All 1 M NaCl data is in 1 M NaCl with no magnesium and are from Xia et al. (1) except for GCGCGC which is from Chen and Znosko (9).



## Supplemental Data

<sup>c</sup>Calculated at 0.1 mM oligomer concentration based on the  $T_m^{-1}$  vs  $\ln C_T$  plots.

## Supplemental Data

**TABLE S4.** Previously Published DNA/RNA Correction Factors

| Eq no.                                        | Name                                                  | Ref no. | Equation                                                                                                                                                                                                                           | Average Deviation <sup>b</sup> |
|-----------------------------------------------|-------------------------------------------------------|---------|------------------------------------------------------------------------------------------------------------------------------------------------------------------------------------------------------------------------------------|--------------------------------|
| DNA/RNA $T_m$ Correction Factors <sup>a</sup> |                                                       |         |                                                                                                                                                                                                                                    |                                |
| S1                                            | Schildkraut-Lifson $T_m$ equation <sup>c,h</sup>      | 2       | $T_m(2) = T_m(1) + 16.6 \log \frac{[Na^+]_2}{[Na^+]_1}$                                                                                                                                                                            | 42.8 °C                        |
| S2                                            | Wetmur $T_m$ equation <sup>c,h</sup>                  | 3       | $T_m(2) = T_m(1) + 16.6 \log \frac{[Na^+]_2 (1 + 0.7 [Na^+]_1)}{[Na^+]_1 (1 + 0.7 [Na^+]_2)}$                                                                                                                                      | 38.9 °C                        |
| S3                                            | Frank-Kamenetskii $T_m$ equation <sup>c,h</sup>       | 4       | $T_m(2) = T_m(1) + (7.95 - 3.057 fGC) \ln \frac{[Na^+]_2}{[Na^+]_1}$                                                                                                                                                               | 35.5 °C                        |
| S4                                            | Marmur-Schildkraut-Doty $T_m$ equation <sup>c,h</sup> | 5 & 6   | $T_m(2) = T_m(1) + (8.75 - 2.83 fGC) \ln \frac{[Na^+]_2}{[Na^+]_1}$                                                                                                                                                                | 41.3 °C                        |
| S5                                            | $T_m$ and $12.5 \log[Na^+]$ equation <sup>c,h</sup>   | 7       | $T_m(2) = T_m(1) + 12.5 \log \frac{[Na^+]_2}{[Na^+]_1}$                                                                                                                                                                            | 31.8 °C                        |
| S6                                            | SantaLucia $T_m$ equation <sup>c,g,h</sup>            | 8       | $\frac{1}{T_m(2)} = \frac{1}{T_m(1)} + \frac{0.368(N_{bp} - 1)}{\Delta H} \ln \frac{[Na^+]_2}{[Na^+]_1}$                                                                                                                           | 18.8 °C                        |
| S7                                            | Chen $T_m$ quadratic equation <sup>d,h</sup>          | 9       | $T_m(2) = T_m(1) + (2.675 - 1.842 fGC) \ln \frac{[Na^+]_2}{[Na^+]_1} - 0.7348 (\ln^2 [Na^+]_2 - \ln^2 [Na^+]_1)$                                                                                                                   | 36.3 °C                        |
| S8                                            | Chen $1/T_m$ quadratic equation <sup>d,g,h</sup>      | 9       | $\frac{1}{T_m(2)} = \frac{1}{T_m(1)} + (2.297 fGC - 2.886) \times 10^{-5} \ln \frac{[Na^+]_2}{[Na^+]_1} + 7.575 \times 10^{-6} (\ln^2 [Na^+]_2 - \ln^2 [Na^+]_1)$                                                                  | 33.3 °C                        |
| S9                                            | Peyret-SantaLucia equation <sup>e,g,i</sup>           | 10      | $\frac{1}{T_m(Mg^{2+})} = \frac{1}{T_m(1 M Na^+)} + \frac{0.368(N_{bp} - 1)}{\Delta H} \times \ln \left( 3.3 \sqrt{[Mg^{2+}]} + [Mon^+] \right)$                                                                                   | 5.0 °C                         |
| S10                                           | Ahsen-Wittwer-Schütz equation <sup>e,g,i</sup>        | 11      | $\frac{1}{T_m(Mg^{2+})} = \frac{1}{T_m(1 M Na^+)} + \frac{0.368(N_{bp} - 1)}{\Delta H} \times \ln \left( 3.79 \sqrt{[Mg^{2+}]} + [Mon^+] \right)$                                                                                  | 4.5 °C                         |
| S11                                           | Tan-Chen equation <sup>f,j</sup>                      | 12      | $\frac{1}{T_m(Mg^{2+})} = \frac{1}{T_m(1 M Na^+)} - \frac{0.00322(N_{bp} - 1)}{\Delta H} \times \left( -\frac{0.6}{N} + 0.025 \ln [Mg^{2+}] + 0.0068 \ln^2 [Mg^{2+}] + \frac{(\ln [Mg^{2+}] + 0.38 \ln^2 [Mg^{2+}])}{N^2} \right)$ | 2.6 °C                         |
| S12                                           | Mitsuhashi equation <sup>e,i</sup>                    | 13      | $T_m(Mg^{2+}) = T_m(1 M Na^+) + 16.6 \log \left( 4 \sqrt{[Mg^{2+}]} + [Mon^+] \right)$                                                                                                                                             | 10.6 °C                        |

## Supplemental Data

|                                                               |                                                                                  |    |                                                                                                                                                                                                                                                                                                                                                                           |               |
|---------------------------------------------------------------|----------------------------------------------------------------------------------|----|---------------------------------------------------------------------------------------------------------------------------------------------------------------------------------------------------------------------------------------------------------------------------------------------------------------------------------------------------------------------------|---------------|
| S13                                                           | Owczarzy magnesium $T_m$ correction factor equation <sup>e,g</sup>               | 14 | $\frac{1}{T_m(Mg^{2+})} = \frac{1}{T_m(1 M Na^+)} + 3.92 \times 10^{-5} - 9.11 \times 10^{-6} \ln[Mg^{2+}] + fGC(6.26 \times 10^{-5} + 1.42 \times 10^{-5} \ln[Mg^{2+}])$ $\frac{1}{2(N_{bp}-1)} [-4.82 \times 10^{-4} + 5.25 \times 10^{-4} \ln[Mg^{2+}] + 8.31 \times 10^{-5} (\ln^2[Mg^{2+}])]$                                                                        | 2.8 °C        |
| DNA/RNA $\Delta G_{37}^\circ$ Correction Factors <sup>a</sup> |                                                                                  |    |                                                                                                                                                                                                                                                                                                                                                                           |               |
| S14                                                           | SantaLucia $\Delta G_{37}^\circ$ equation <sup>c,h</sup>                         | 8  | $\Delta G_{37}^\circ(2) = \Delta G_{37}^\circ(1) - 0.114 \times (N_{bp} - 1) \ln \left[ \frac{[Na^+]_2}{[Na^+]_1} \right]$                                                                                                                                                                                                                                                | 3.66 kcal/mol |
| S15                                                           | Chen $\Delta G_{37}^\circ$ derived equation <sup>d,h</sup>                       | 9  | $\Delta G_{37}^\circ(2) = \Delta G_{37}^\circ(1) - 310.15 \times \Delta H \times$ $\left[ (2.297 fGC - 2.886) \times 10^{-5} \times \ln \left[ \frac{[Na^+]_2}{[Na^+]_1} \right] + 7.575 \times 10^{-6} \times (\ln^2[Na^+]_2 - \ln^2[Na^+]_1) \right]$                                                                                                                   | 6.78 kcal/mol |
| S16                                                           | Chen $\Delta G_{37}^\circ$ linear equation <sup>d,h</sup>                        | 9  | $\Delta G_{37}^\circ(2) = \Delta G_{37}^\circ(1) + (0.324 fGC - 0.765) \ln \left[ \frac{[Na^+]_2}{[Na^+]_1} \right]$                                                                                                                                                                                                                                                      | 3.28 kcal/mol |
| S17                                                           | Chen $\Delta G_{37}^\circ$ quadratic equation <sup>d,h</sup>                     | 9  | $\Delta G_{37}^\circ(2) = \Delta G_{37}^\circ(1) + (0.324 fGC - 0.468) \ln \left[ \frac{[Na^+]_2}{[Na^+]_1} \right] + 0.133 (\ln^2[Na^+]_2 - \ln^2[Na^+]_1)$                                                                                                                                                                                                              | 6.60 kcal/mol |
| S18                                                           | Chen $1/\Delta G_{37}^\circ$ quadratic equation <sup>d,h</sup>                   | 9  | $\frac{1}{\Delta G_{37}^\circ(2)} = \frac{1}{\Delta G_{37}^\circ(1)} + (0.016 - 0.0213 fGC) \times 10^{-5} \ln \left[ \frac{[Na^+]_2}{[Na^+]_1} \right] -$ $0.0045 (\ln^2[Na^+]_2 - \ln^2[Na^+]_1)$                                                                                                                                                                       | 4.13 kcal/mol |
| S19                                                           | Owczarzy magnesium $\Delta G_{37}^\circ$ correction factor equation <sup>e</sup> | 14 | $\Delta G_{37}^\circ(Mg^{2+}) = \Delta G_{37}^\circ(1 M Na^+) - 310.15 \Delta H \times$ $\left\{ 3.92 \times 10^{-5} - 9.11 \times 10^{-6} \ln[Mg^{2+}] + fGC(6.26 \times 10^{-5} + 1.42 \times 10^{-5} \ln[Mg^{2+}]) + \right.$ $\left. \frac{1}{2(N_{bp}-1)} [-4.82 \times 10^{-4} + 5.25 \times 10^{-4} \ln[Mg^{2+}] + 8.31 \times 10^{-5} (\ln^2[Mg^{2+}])] \right\}$ | 0.59 kcal/mol |

<sup>a</sup>1 M NaCl melting temperatures and free energy values were used as the starting point for all correction factors tested.

<sup>b</sup>As stated in Materials and Methods,  $|\Delta T_m|_{ave}$  is used to evaluate the average deviation of the  $T_m$  correction factors, and  $|\Delta \Delta G_{37}^\circ|_{ave}$  is used to evaluate the average deviation of the  $\Delta G_{37}^\circ$  correction factors.

<sup>c</sup>Correction factors for DNA in  $Na^+$ .

<sup>d</sup>Correction factors for RNA in  $Na^+$ .

<sup>e</sup>Correction factors for DNA in  $Mg^{2+}$ .

<sup>f</sup>Correction factors for RNA in  $Mg^{2+}$ .

<sup>g</sup>In this equation,  $T_m$  should be in units of K.

<sup>h</sup> $[Na^+]_2$  is replaced with  $[Mg^{2+}]$  to test for average deviation.

<sup>i</sup>Original equation includes a contribution from the monovalent ion concentration. Here, these values were irrelevant.

<sup>j</sup> $\Delta H^\circ$  in this equation is in kcal/mol. In every other equation, it is in cal/mol.

## Supplemental Data

**TABLE S5.** Leave-one-out  $T_m$  predictions compared to Eq. 7  $T_m$  predictions.

| Sequences<br>(5'-3') <sup>a</sup> | $T_m$ (°C)                |                             |                       |                           |                             |                       |                           |                             |                       |                           |                             |                       |
|-----------------------------------|---------------------------|-----------------------------|-----------------------|---------------------------|-----------------------------|-----------------------|---------------------------|-----------------------------|-----------------------|---------------------------|-----------------------------|-----------------------|
|                                   | 0.5 mM Mg <sup>2+</sup>   |                             |                       | 1.5 mM Mg <sup>2+</sup>   |                             |                       | 3.0 mM Mg <sup>2+</sup>   |                             |                       | 10.0 mM Mg <sup>2+</sup>  |                             |                       |
|                                   | LOO<br>Pred. <sup>b</sup> | Eq. 7<br>Pred. <sup>c</sup> | \Delta T <sub>m</sub> | LOO<br>Pred. <sup>b</sup> | Eq. 7<br>Pred. <sup>c</sup> | \Delta T <sub>m</sub> | LOO<br>Pred. <sup>b</sup> | Eq. 7<br>Pred. <sup>c</sup> | \Delta T <sub>m</sub> | LOO<br>Pred. <sup>b</sup> | Eq. 7<br>Pred. <sup>c</sup> | \Delta T <sub>m</sub> |
| CGCGCG                            | 53.6                      | 53.6                        | 0.0                   | 56.7                      | 56.7                        | 0.0                   | 58.2                      | 58.2                        | 0.0                   | 60.0                      | 60.0                        | 0.0                   |
| CGGCCG                            | 59.2                      | 59.0                        | 0.2                   | 62.2                      | 62.1                        | 0.1                   | 63.7                      | 63.6                        | 0.1                   | 65.5                      | 65.4                        | 0.1                   |
| GCGCGC                            | 58.8                      | 58.3                        | 0.5                   | 61.9                      | 61.4                        | 0.5                   | 63.3                      | 62.9                        | 0.4                   | 65.1                      | 64.7                        | 0.4                   |
| ACUUAAGU                          | 34.3                      | 33.9                        | 0.4                   | 37.6                      | 37.3                        | 0.3                   | 39.3                      | 39.0                        | 0.3                   | 41.4                      | 41.2                        | 0.2                   |
| AACUAGUU                          | 39.5                      | 39.3                        | 0.2                   | 42.9                      | 42.7                        | 0.2                   | 44.6                      | 44.4                        | 0.2                   | 46.7                      | 46.6                        | 0.1                   |
| ACUAUAGU                          | 37.6                      | 37.6                        | 0.0                   | 41.0                      | 41.0                        | 0.0                   | 42.7                      | 42.7                        | 0.0                   | 44.9                      | 44.9                        | 0.0                   |
| AGAUAUUCU                         | 35.1                      | 35.0                        | 0.1                   | 38.4                      | 38.4                        | 0.0                   | 40.1                      | 40.1                        | 0.0                   | 42.3                      | 42.3                        | 0.0                   |
| ACCGGU                            | 48.5                      | 48.8                        | 0.3                   | 51.7                      | 52.0                        | 0.3                   | 53.3                      | 53.5                        | 0.2                   | 55.3                      | 55.5                        | 0.2                   |
| GCAUGC                            | 40.6                      | 40.6                        | 0.0                   | 43.8                      | 43.8                        | 0.0                   | 45.4                      | 45.3                        | 0.1                   | 47.3                      | 47.3                        | 0.0                   |
| AGCGCU                            | 47.1                      | 46.9                        | 0.2                   | 50.2                      | 50.1                        | 0.1                   | 51.8                      | 51.6                        | 0.2                   | 53.8                      | 53.6                        | 0.2                   |
| CACGUG                            | 37.6                      | 37.7                        | 0.1                   | 40.8                      | 40.9                        | 0.1                   | 42.4                      | 42.4                        | 0.0                   | 44.4                      | 44.4                        | 0.0                   |
| CAGCUG                            | 38.0                      | 38.0                        | 0.0                   | 41.2                      | 41.2                        | 0.0                   | 42.8                      | 42.7                        | 0.1                   | 44.7                      | 44.7                        | 0.0                   |
| CCAUGG                            | 41.1                      | 41.3                        | 0.2                   | 44.3                      | 44.5                        | 0.2                   | 45.9                      | 46.0                        | 0.1                   | 47.9                      | 48.0                        | 0.1                   |
| CCUAGG                            | 44.6                      | 44.9                        | 0.3                   | 47.9                      | 48.1                        | 0.2                   | 49.5                      | 49.6                        | 0.1                   | 51.5                      | 51.6                        | 0.1                   |
| CUGCAG                            | 40.2                      | 40.2                        | 0.0                   | 43.4                      | 43.4                        | 0.0                   | 45.0                      | 44.9                        | 0.1                   | 47.0                      | 46.9                        | 0.1                   |
| GACGUC                            | 41.0                      | 41.1                        | 0.1                   | 44.2                      | 44.3                        | 0.1                   | 45.8                      | 45.8                        | 0.0                   | 47.8                      | 47.8                        | 0.0                   |
| GAGCUC                            | 43.7                      | 43.6                        | 0.1                   | 46.9                      | 46.8                        | 0.1                   | 48.5                      | 48.3                        | 0.2                   | 50.4                      | 50.3                        | 0.1                   |
| Average                           |                           |                             | 0.2                   |                           |                             | 0.1                   |                           |                             | 0.1                   |                           |                             | 0.1                   |
| Overall Average                   |                           |                             |                       |                           |                             | 0.1                   |                           |                             |                       |                           |                             |                       |

<sup>a</sup>All sequences form self-complementary duplexes in solution.

<sup>b</sup>Predicted  $T_m$  using coefficients derived from leave-one-out (LOO) analysis.

<sup>c</sup>Predicted  $T_m$  using coefficients in Eq. 7.

## Supplemental Data

**TABLE S6.** Leave-one-out  $\Delta G^{\circ}_{37}$  predictions compared to Eq. 12  $\Delta G^{\circ}_{37}$  predictions.

| Sequences<br>(5'-3') <sup>a</sup> | $\Delta G^{\circ}_{37}$ (kcal/mol) |                              |                                 |                           |                              |                                 |                           |                              |                                 |                           |                              |                                 |
|-----------------------------------|------------------------------------|------------------------------|---------------------------------|---------------------------|------------------------------|---------------------------------|---------------------------|------------------------------|---------------------------------|---------------------------|------------------------------|---------------------------------|
|                                   | 0.5 mM Mg <sup>2+</sup>            |                              |                                 | 1.5 mM Mg <sup>2+</sup>   |                              |                                 | 3.0 mM Mg <sup>2+</sup>   |                              |                                 | 10.0 mM Mg <sup>2+</sup>  |                              |                                 |
|                                   | LOO<br>Pred. <sup>b</sup>          | Eq. 12<br>Pred. <sup>c</sup> | $ \Delta\Delta G^{\circ}_{37} $ | LOO<br>Pred. <sup>b</sup> | Eq. 12<br>Pred. <sup>c</sup> | $ \Delta\Delta G^{\circ}_{37} $ | LOO<br>Pred. <sup>b</sup> | Eq. 12<br>Pred. <sup>c</sup> | $ \Delta\Delta G^{\circ}_{37} $ | LOO<br>Pred. <sup>b</sup> | Eq. 12<br>Pred. <sup>c</sup> | $ \Delta\Delta G^{\circ}_{37} $ |
| CGCGCG                            | -8.41                              | -8.48                        | 0.07                            | -8.98                     | -9.04                        | 0.06                            | -9.27                     | -9.32                        | 0.05                            | -9.60                     | -9.64                        | 0.04                            |
| CGGCCG                            | -9.26                              | -9.26                        | 0.00                            | -9.83                     | -9.82                        | 0.00                            | -10.11                    | -10.10                       | 0.01                            | -10.44                    | -10.42                       | 0.01                            |
| GCGCGC                            | -10.11                             | -9.92                        | 0.19                            | -10.66                    | -10.48                       | 0.18                            | -10.92                    | -10.76                       | 0.17                            | -11.23                    | -11.08                       | 0.14                            |
| ACUUAAGU                          | -5.12                              | -5.07                        | 0.05                            | -5.74                     | -5.70                        | 0.04                            | -6.05                     | -6.02                        | 0.03                            | -6.44                     | -6.41                        | 0.02                            |
| AACUAGUU                          | -6.09                              | -6.07                        | 0.02                            | -6.72                     | -6.70                        | 0.02                            | -7.03                     | -7.02                        | 0.02                            | -7.43                     | -7.41                        | 0.01                            |
| ACUAUAGU                          | -5.89                              | -5.89                        | 0.01                            | -6.51                     | -6.52                        | 0.01                            | -6.83                     | -6.84                        | 0.01                            | -7.22                     | -7.23                        | 0.01                            |
| AGAUUAUCU                         | -5.55                              | -5.49                        | 0.06                            | -6.17                     | -6.12                        | 0.05                            | -6.48                     | -6.44                        | 0.04                            | -6.87                     | -6.83                        | 0.03                            |
| ACCGGU                            | -7.62                              | -7.67                        | 0.05                            | -8.22                     | -8.26                        | 0.05                            | -8.51                     | -8.56                        | 0.05                            | -8.87                     | -8.91                        | 0.04                            |
| GCAUGC                            | -6.56                              | -6.54                        | 0.02                            | -7.15                     | -7.13                        | 0.02                            | -7.44                     | -7.43                        | 0.02                            | -7.80                     | -7.78                        | 0.02                            |
| AGCGCU                            | -7.18                              | -7.15                        | 0.03                            | -7.77                     | -7.74                        | 0.03                            | -8.06                     | -8.04                        | 0.02                            | -8.41                     | -8.39                        | 0.02                            |
| CACGUG                            | -5.74                              | -5.75                        | 0.01                            | -6.33                     | -6.34                        | 0.01                            | -6.63                     | -6.64                        | 0.01                            | -6.99                     | -6.99                        | 0.00                            |
| CAGCUG                            | -5.84                              | -5.84                        | 0.00                            | -6.44                     | -6.43                        | 0.00                            | -6.73                     | -6.73                        | 0.01                            | -7.09                     | -7.08                        | 0.01                            |
| CCAUGG                            | -6.43                              | -6.46                        | 0.03                            | -7.02                     | -7.05                        | 0.03                            | -7.31                     | -7.35                        | 0.03                            | -7.67                     | -7.70                        | 0.03                            |
| CCUAGG                            | -6.90                              | -6.96                        | 0.06                            | -7.50                     | -7.55                        | 0.05                            | -7.80                     | -7.85                        | 0.05                            | -8.16                     | -8.20                        | 0.04                            |
| CUGCAG                            | -6.27                              | -6.27                        | 0.00                            | -6.86                     | -6.86                        | 0.00                            | -7.16                     | -7.16                        | 0.00                            | -7.51                     | -7.51                        | 0.00                            |
| GACGUC                            | -6.51                              | -6.51                        | 0.00                            | -7.10                     | -7.10                        | 0.01                            | -7.39                     | -7.40                        | 0.01                            | -7.74                     | -7.75                        | 0.01                            |
| GAGCUC                            | -7.18                              | -7.14                        | 0.04                            | -7.77                     | -7.73                        | 0.04                            | -8.06                     | -8.03                        | 0.04                            | -8.41                     | -8.38                        | 0.03                            |
| Average                           |                                    |                              | 0.04                            |                           |                              | 0.04                            |                           |                              | 0.03                            |                           |                              | 0.03                            |
| Overall Average                   |                                    |                              |                                 |                           |                              | 0.04                            |                           |                              |                                 |                           |                              |                                 |

<sup>a</sup>All sequences form self-complementary duplexes in solution.

<sup>b</sup>Predicted  $\Delta G^{\circ}_{37}$  using coefficients derived from leave-one-out (LOO) analysis.

<sup>c</sup>Predicted  $\Delta G^{\circ}_{37}$  using coefficients in Eq. 12.

### SUPPORTING REFERENCES

1. Xia, T. B., J. SantaLucia, M. E. Burkard, R. Kierzek, S. J. Schroeder, X. Q. Jiao, C. Cox, and D. H. Turner. 1998. Thermodynamic parameters for an expanded nearest-neighbor model for formation of RNA duplexes with Watson-Crick base pairs. *Biochemistry*. 37:14719-14735. <https://doi.org/10.1021/bi9809425>.
2. Schildkraut, C., and S. Lifson. 1965. Dependence of the melting temperature of DNA on salt concentration. *Biopolymers*. 3:195-208. <https://doi.org/10.1002/bip.360030207>.
3. Wetmur, J. G. 1991. DNA probes: applications of the principles of nucleic acid hybridization. *Crit. Rev. Biochem. Mol. Biol.* 26:227-259. <https://doi.org/10.3109/10409239109114069>.
4. Frank-Kamenetskii, M. D. 1971. Simplification of the empirical relationship between melting temperature of DNA, its GC content and concentration of sodium ions in solution. *Biopolymers*. 10:2623-2624. <https://doi.org/10.1002/bip.360101223>.
5. Blake, R. D., and S.G. Delcourt. 1998. Thermal stability of DNA. *Nucleic Acids Res.* 36:3323-3332. <https://doi.org/10.1093/nar/26.14.3323>.
6. Marmur, J., and P. Doty. 1962. Determination of the base composition of deoxyribonucleic acid from its thermal denaturation temperature. *J. Mol. Biol.* 5:109-118. [https://doi.org/10.1016/S0022-2836\(62\)80066-7](https://doi.org/10.1016/S0022-2836(62)80066-7).
7. SantaLucia, J., Jr. 1998. A unified view of polymer, dumbbell, and oligonucleotide DNA nearest-neighbor thermodynamics. *Proc. Natl. Acad. Sci. U.S.A.* 95:1460-1465. <https://doi.org/10.1073/pnas.95.4.1460>.
8. SantaLucia, J., Jr., H. T. Allawi, and P. A. Seneviratne. 1996. Improved nearest-neighbor parameters for predicting DNA duplex stability. *Biochemistry*. 35:3555-3562. <https://doi.org/10.1021/bi951907q>.
9. Chen, Z., and B. M. Znosko. 2013. Effect of sodium ions on RNA duplex stability. *Biochemistry*. 52:7477-7485. <https://doi.org/10.1021/bi4008275>.
10. Peyret, N. (2000). Prediction of Nucleic Acid Hybridization: Parameters and Algorithms. PhD dissertation. Wayne State University.
11. von Ahsen, N., C. T. Wittwer, and E. Schütz. 2001. Oligonucleotide melting temperatures under PCR conditions: nearest-neighbor corrections for  $Mg^{2+}$ , deoxynucleotide triphosphate, and dimethyl sulfoxide concentrations with comparison to alternative empirical formulas. *Clin. Chem.* 47: 1956-1961. <https://doi.org/10.1093/clinchem/47.11.1956>.
12. Tan, Z., and S. Chen. 2007. RNA helix stability in mixed  $Na^+/Mg^{2+}$  solution. *Biophys. J.* 92:3615-3632. <https://doi.org/10.1529/biophysj.106.100388>.
13. Mitsuhashi, M. 1996. Technical Report: part 1. Basic requirements for designing optimal oligonucleotide probe sequences. *J. Clin. Lab. Anal.* 10:277-284. [https://doi.org/10.1002/\(SICI\)1098-2825\(1996\)10:5%3C277::AID-JCLA8%3E3.0.CO;2-5](https://doi.org/10.1002/(SICI)1098-2825(1996)10:5%3C277::AID-JCLA8%3E3.0.CO;2-5).
14. Owczarzy, R., B. G. Moreira, Y. You, M. A. Behlki, and J. A. Walder. 2008. Predicting stability of DNA duplexes in solutions containing magnesium and monovalent cations. *Biochemistry*. 47:5336-5353. <https://doi.org/10.1021/bi702363u>.
15. McDowell, J. A., and D. H. Turner. 1996. Investigation of the structural basis for thermodynamic stabilities of tandem GU mismatches: solution structure of  $(rGAGGUCUC)_2$  by two-dimensional NMR and simulated annealing. *Biochemistry*. 35:14077-14089. <https://doi.org/10.1021/bi9615710>.
